# Supplementary material for: Overexpression of HMGB1 in melanoma predicts patient survival and suppression of HMGB1 induces cell cycle arrest and senescence in association with p21 (Waf1/Cip1) up-regulation via a p53-independent, Sp1-dependent pathway
Source: PubMed Central journal article supplement (PMC4171638; doi:10.18632/oncotarget.2201), 2014-07-23
Supplement: oncotarget-05-6387-s001.pdf [file oncotarget-05-6387-s001.pdf]

## SUPPLEMENTARY FIGURES AND TABLES

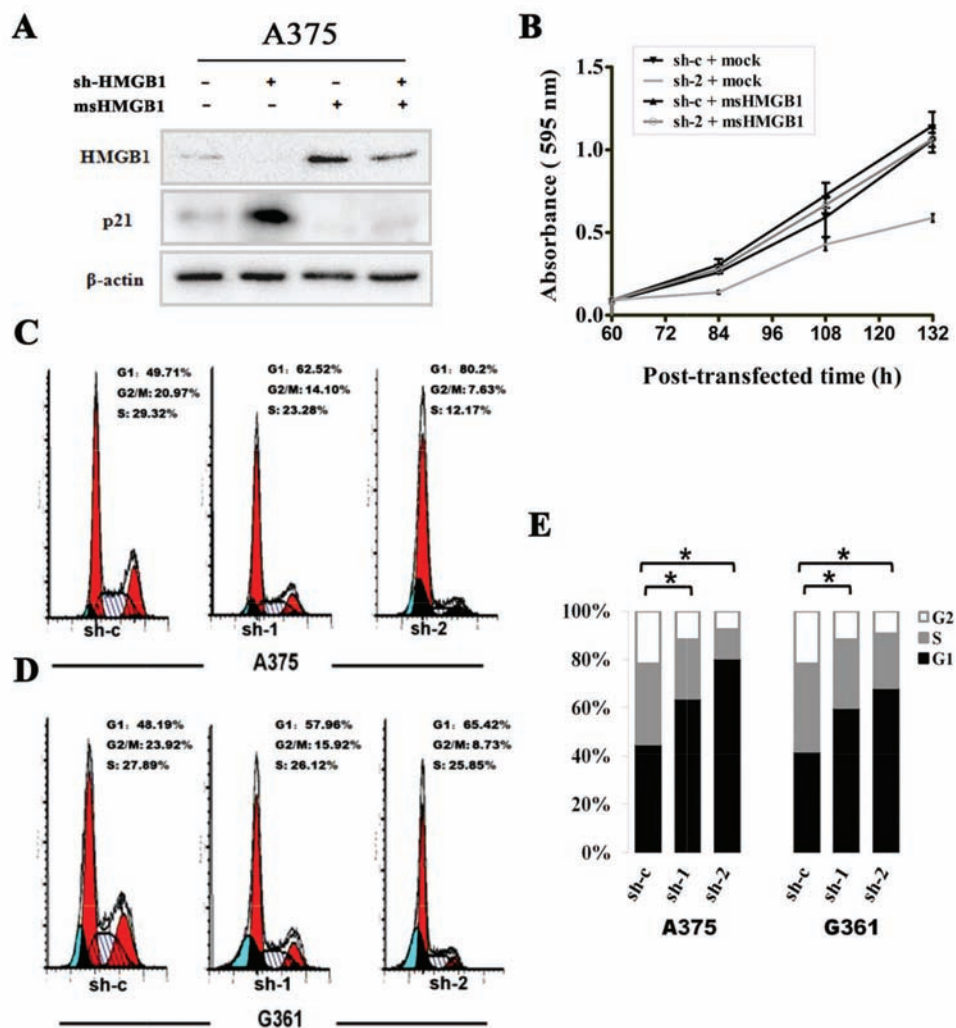

**Supplementary Figure S1: Rescue experiment in A375 cells and HMGB1 depletion in A375 and G361 cells induced cell cycle arrest.** (A) Re-expression of HMGB1 in shRNAi-HMGB1 expressing A375 cells as shown by western blots. The upregulated protein levels of p21 in shRNAi-HMGB1 expressing A375 cells were decreased upon on the reintroduction of HMGB1 using a mouse HMGB1 expression plasmid (msHMGB1). (B) As shown by MTT assay, the proliferation of cells in which HMGB1 knocked down was suppressed, and the re-expression of HMGB1 completely rescued the retarded rate of cell proliferation in the shRNAi expressing A375 cells. mock, control pCMV plasmid. (C-D) Representative Cell Cycle profiles of HMGB1 depleted (sh-1 and sh-2) or control (sh-c) in A375 (C) and G361 (D) by staining with propidium iodide (PI) using FACS analysis. (E) The numbers of cells in each cell cycle were quantified and presented as mean  $\pm$  SD from three independent experiments. Bars, SD; \*P < 0.05

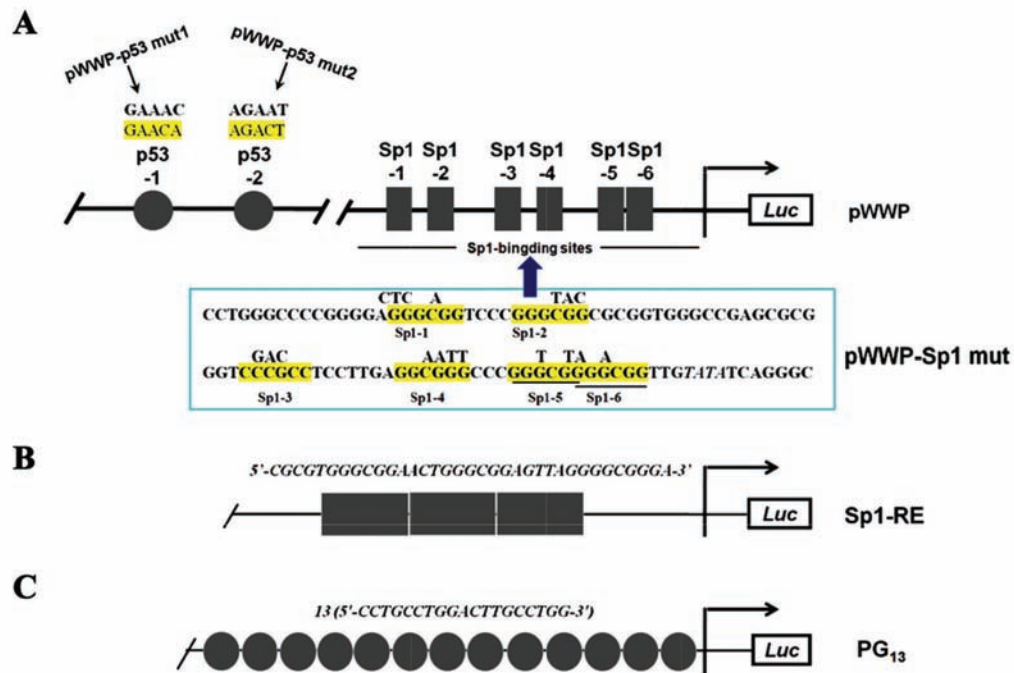

**Supplementary Figure S2: Schematic presentation of luciferase constructs.** (A) Full-length (pWWP-Luc), mutant p21 promoter luciferase plasmids (pWWP-p53 mut1, pWWP-p53 mut2, and pWWP-Sp1 mut). The human wild-type p21 promoter luciferase fusion plasmid (full-length), pWWP-Luc promoter construct, was made from a 2.4-kb genomic fragment of p21 promoter containing the transcriptional start site, two p53 binding sites and six Sp1-binding sites. The pWWP-p53 mut1 vector, in which the first p53-binding site, GAACA (-2234 to -2230 relative to the translational start site) was replaced with GAAAC in pWWP-p53 mut1-Luc. The pWWP-p53 mut2 vector, in which the second binding site, AGACT (-1344 to -1340 relative to the translational start site) was replaced with AGAAT in pWWP-p53 mut2-Luc. The pWWP-Sp1 mut luciferase reporter plasmid contains six mutated Sp1 binding sites. Sequences shown in reverse color show consensus binding sites for the transcription factor Sp1 (sites 1-6). Nucleotide substitutions that were introduced into the p21 promoter are shown on top of the sequence. (B) The Sp1 responsive elements (Sp1-RE-Luc, which contains three consensus Sp1 binding sites), and (C) PG13-Luc, which contains thirteen consensus p53 binding sites (5'-CCTGCCTGGACTTGCCTGG-3'), driving luciferase plasmids used in transfection assays.

**Supplementary Table S1.** Sequences of shRNA/siRNA

| shRNA/<br>siRNA      |      | sequences                                                                                                                             |
|----------------------|------|---------------------------------------------------------------------------------------------------------------------------------------|
| HMGB1<br>shRNA       | sh-1 | 5'-CcgGATTGCTGCATATCGAGCTAAACTCGAGTTTAGCTCGATATGCAGCAATTTTTg-3'<br>5'-aattcaaaaaATTGCTGCATATCGAGCTAAACTCGAGTTTAGCTCGATATGCAGCAAT-3'   |
|                      | sh-2 | 5'-CcgGTTGGTGATGTTGCGAAGAAACCTCGAGGTTTCTTCGCAACATCACCAATTTTTg-3'<br>5'-aattcaaaaaTTGGTGATGTTGCGAAGAAACCTCGAGGTTTCTTCGCAACATCACCAA-3'  |
|                      | sh-3 | 5'-CcgGATGCAGCTTATACGAAATAACTCGAGTTATTTTCGTATAAGCTGCATCTTTTTg-3'<br>5'-aattcaaaaaGATGCAGCTTATACGAAATAACTCGAGTTATTTTCGTATAAGCTGCATC-3' |
| p53 siRNA            |      | 5'-UCAAAUCAUCCAUUGCUUGGG-3'<br>5'-CAAGCAAUGGAUGAUUUGAUG-3'                                                                            |
|                      |      | 5'-UGAACAUGAGUUUUUUAUGGC-3'<br>5'-CAUAAAAAACUCAUGUUCAAG-3'                                                                            |
| p21<br>siRNA(44, 45) |      | 5'-CUUCGACUUUGUCACCGAG-3'<br>5'-CAU ACUGGCCUGGACUGUUU-3'                                                                              |
| Sp1<br>siRNA(46, 47) |      | 5'-GGUAGCUCUAAGUUUUGAUtt-3'<br>5'-GGUCAUUUCUUUGCUUAUGtt-3'<br>5'-UGUAGAGUCUGCCAACUGACCUGUC-3'                                         |

HMGB1 shRNAs were purchased from GeneChem company, Ltd, Shanghai, China; p53siRNAs were designed using siDirect (<http://design.RNAi.jp/>).

**Supplementary Table S2.** Real time RT-PCR primers

| Symbol | Forward primer (5'-3') | Reverse primer (5'-3') |
|--------|------------------------|------------------------|
| HMGB1  | TTGCGAAGAACTGGGAGAG    | CAGCCTTGACAACTCCCTTT   |
| p21    | AGCAGCGGAACAAGGAGT     | CGTTAGTGCCAGGAAAGACA   |
| GAPDH  | CGACCACTTTGTCAAGCTCA   | AGGGGTCTACATGGCAACTG   |
| p16    | ATATGCCTTCCCCACTACC    | CGTGAGTGCTCACTCCAGAA   |
| p18    | GGACCCAGGACTATCCCTTC   | TTTAGGGTCCCTTG TTCACG  |
| p15    | GCGGATTTCCAGGGATATT    | CACCAGGTCCAGTCAAGGAT   |
| p27    | CAGGTAGTTTGGGGCAAAAA   | ACAGCCCGAAGTGAAAAGAA   |
| p57    | AGAGATCAGCGCCTGAGAAG   | TGGGCTCTAAATTGGCTCAC   |

Primers used in PCR were designed using Primer Premier 5.0 (Premier Biosoft International, Palo Alto, CA) and the online utility Primer 3 (<http://frodo.wi.mit.edu/primer3/>).
